# Supplementary material for: Association of maternal polycystic ovary syndrome and diabetes with preterm birth and offspring birth size: a population-based cohort study
Source: PubMed Central journal article supplement — Hum Reprod. 2022 Mar 26;37(6):1311–23. doi: 10.1093/humrep/deac050 (PMC9156851; doi:10.1093/humrep/deac050), 2022-03-26
Supplement: deac050_supplementary_data_file.pdf [file deac050_supplementary_data_file.pdf]

## Supplementary Data

### The drugs and pregnancy database

Currently, the Drugs and Pregnancy Database is maintained by the Finnish Institute for Health and Welfare (THL), with data collected from the Medical Birth Register, the Register on Induced Abortions and the Register of Congenital Malformations. Since the beginning of pregnancy till 7 days after birth, information on mothers, live births and stillbirths with a birth weight of  $\geq 500$ g or a gestational age  $\geq 22$  weeks was collected and registered in the Medical Birth Register, which was complemented by the Register on Induced Abortions and the Register of Congenital Malformations.

### The Finnish Care Registers for Health Care

Established in 1967, the Finnish Care Registers for Health Care (HILMO) is maintained by the THL and covers all hospital and

healthcare providers in Finland. In this register, a main diagnosis and two other diagnoses are recorded for each patient according to ICD code. The ICD-10 came into use in Finland since 1 January 1996. In this study, ICD-9 codes were also used in order to identify cases during the transitional stage.

### The Finnish Register on Reimbursement Drugs

Kept by the Social Insurance Institution, the Finnish Register on Reimbursement Drugs was established in 1996. This register records all reimbursed drug prescriptions in Finland using the Anatomical Therapeutic Chemical Classification System (ATC). All Finnish citizens and permanent residents are entitled to reimburse prescribed medications.
