# Supplementary material for: Association of maternal polycystic ovary syndrome and diabetes with preterm birth and offspring birth size: a population-based cohort study
Source: PubMed Central journal article supplement — Hum Reprod. 2022 Mar 26;37(6):1311–23. doi: 10.1093/humrep/deac050 (PMC9156851; doi:10.1093/humrep/deac050), 2022-03-26
Supplement: deac050_supplementary_figure_s1.pdf [file deac050_supplementary_figure_s1.pdf]

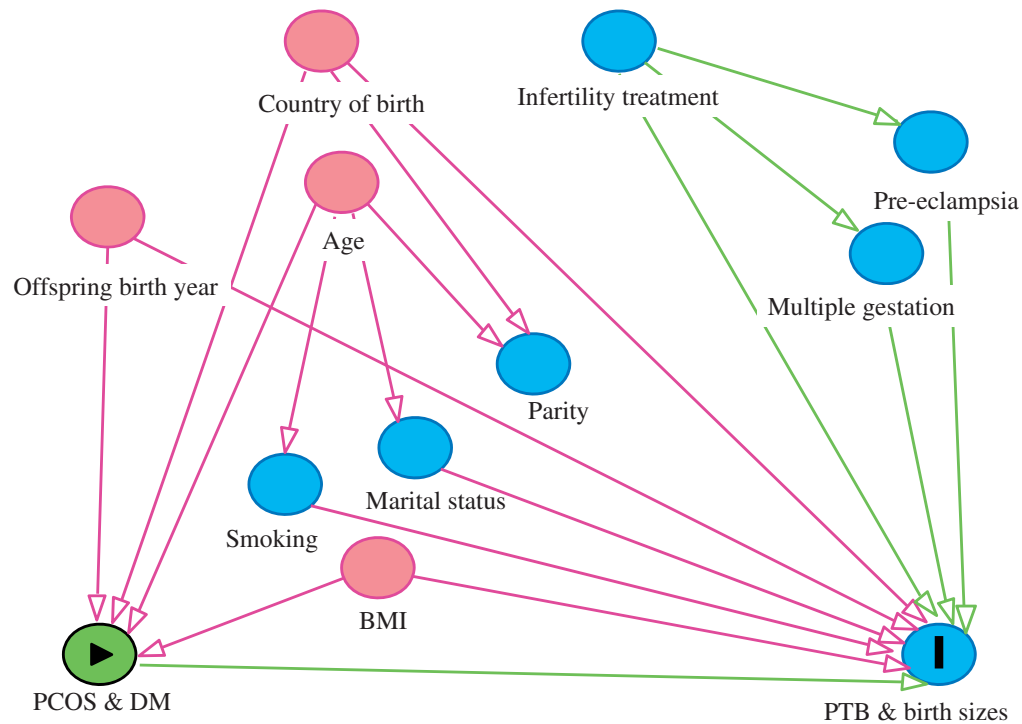

**Supplementary Figure S1. Directed acyclic graph derived from previous literature and expert knowledge.** Nodes represent ancestors of exposures and/or outcomes, and lines indicate biasing or causal paths. Exposures are PCOS (polycystic ovary syndrome) and comorbid diabetes mellitus (DM), and outcome measures include preterm birth (PTB) and birth sizes (large or small for gestational age).
