# Supplementary material for: Association of maternal polycystic ovary syndrome and diabetes with preterm birth and offspring birth size: a population-based cohort study
Source: PubMed Central journal article supplement — Hum Reprod. 2022 Mar 26;37(6):1311–23. doi: 10.1093/humrep/deac050 (PMC9156851; doi:10.1093/humrep/deac050), 2022-03-26
Supplement: deac050_supplementary_table_si.pdf [file deac050_supplementary_table_si.pdf]

human reproduction **SUPPLEMENTARY DATA**

**Supplementary Table S1** Number and percentage of preterm birth according to maternal PCOS and diabetes.

|                               |               | Maternal PCOS |            |           |            | No maternal PCOS |            |            |             |
|-------------------------------|---------------|---------------|------------|-----------|------------|------------------|------------|------------|-------------|
|                               |               | No DM         | GDM        | T2DM      | DM-IT      | No DM            | GDM        | T2DM       | DM-IT       |
| <b>Birth cohort 1996–2014</b> | Total preterm |               |            |           |            |                  |            |            |             |
|                               | <37 weeks     | 1552 (8.3)    | 426 (8.2)  | 79 (14.7) | 111 (35.7) | 48 514 (5.3)     | 7023 (4.8) | 786 (9.6)  | 2054 (36.6) |
|                               | 32–36 weeks   | 1280 (6.9)    | 376 (7.2)  | 62 (11.5) | 100 (32.2) | 42 033 (4.6)     | 6313 (4.3) | 693 (8.5)  | 1899 (33.8) |
|                               | 28–31 weeks   | 173 (0.9)     | 34 (0.7)   | 12 (2.2)  | 8 (2.6)    | 4707 (0.5)       | 535 (0.4)  | 67 (0.8)   | 128 (2.3)   |
|                               | <28 weeks     | 99 (0.5)      | 16 (0.3)   | 5 (0.9)   | 3 (1.0)    | 1774 (0.2)       | 175 (0.1)  | 26 (0.3)   | 27 (0.5)    |
|                               | Spontaneous   |               |            |           |            |                  |            |            |             |
|                               | <37 weeks     | 1139 (8.4)    | 312 (9.7)  | 53 (20.1) | 60 (53.1)  | 36 467 (5.2)     | 5166 (5.3) | 526 (11.5) | 958 (49.4)  |
|                               | 32–36 weeks   | 912 (6.7)     | 271 (8.4)  | 38 (14.4) | 52 (46.0)  | 30 958 (4.4)     | 4577 (4.7) | 450 (9.9)  | 843 (43.4)  |
|                               | 28–31 weeks   | 143 (1.1)     | 26 (0.8)   | 11 (4.2)  | 6 (5.3)    | 3942 (0.6)       | 439 (0.4)  | 55 (1.2)   | 92 (4.7)    |
|                               | <28 weeks     | 84 (0.6)      | 15 (0.5)   | 4 (1.5)   | 2 (1.8)    | 1567 (0.2)       | 150 (0.2)  | 21 (0.5)   | 23 (1.2)    |
| <b>Birth cohort 2004–2014</b> | Total preterm |               |            |           |            |                  |            |            |             |
|                               | <37 weeks     | 1109 (8.1)    | 339 (8.2)  | 43 (12.9) | 81 (33.2)  | 29 772 (5.2)     | 4993 (4.9) | 362 (9.6)  | 1471 (37.5) |
|                               | 32–36 weeks   | 910 (6.7)     | 297 (7.2)  | 35 (10.5) | 76 (31.1)  | 25 768 (4.5)     | 4487 (4.4) | 319 (8.4)  | 1383 (35.3) |
|                               | 28–31 weeks   | 134 (1.0)     | 30 (0.7)   | 6 (1.8)   | 4 (1.6)    | 2860 (0.5)       | 376 (0.4)  | 32 (0.8)   | 72 (1.8)    |
|                               | <28 weeks     | 65 (0.5)      | 12 (0.3)   | 2 (0.6)   | 1 (0.4)    | 1144 (0.2)       | 130 (0.1)  | 11 (0.3)   | 16 (0.4)    |
|                               | Spontaneous   |               |            |           |            |                  |            |            |             |
|                               | <37 weeks     | 748 (8.0)     | 234 (10.2) | 21 (16.3) | 43 (51.2)  | 20 107 (5.0)     | 3274 (5.4) | 193 (11.6) | 634 (50.5)  |
|                               | 32–36 weeks   | 595 (6.4)     | 200 (8.7)  | 17 (13.2) | 39 (46.4)  | 17 008 (4.2)     | 2894 (4.7) | 160 (9.6)  | 571 (45.5)  |
|                               | 28–31 weeks   | 100 (1.1)     | 23 (1.0)   | 3 (2.3)   | 3 (3.6)    | 2176 (0.5)       | 276 (0.5)  | 25 (1.5)   | 49 (3.9)    |
|                               | <28 weeks     | 53 (0.6)      | 11 (0.5)   | 1 (0.8)   | 1 (1.2)    | 923 (0.2)        | 104 (0.2)  | 8 (0.5)    | 14 (1.1)    |

Data are n (%). DM-IT, prepregnancy insulin-treated diabetes mellitus; T2DM, non-insulin-treated type 2 diabetes mellitus; GDM, gestational diabetes mellitus; PCOS, polycystic ovary syndrome. Mothers with DM-IT were excluded from the groups of T2DM and GDM, and likewise, mothers with T2DM were excluded from the GDM group. Mothers without DM-IT, T2DM or GDM were grouped as having no DM (diabetes mellitus).
