# Supplementary material for: Association of maternal polycystic ovary syndrome and diabetes with preterm birth and offspring birth size: a population-based cohort study
Source: PubMed Central journal article supplement — Hum Reprod. 2022 Mar 26;37(6):1311–23. doi: 10.1093/humrep/deac050 (PMC9156851; doi:10.1093/humrep/deac050), 2022-03-26
Supplement: deac050_supplementary_table_sii.pdf [file deac050_supplementary_table_sii.pdf]

**Supplementary Table SII Modes of delivery for preterm births according to maternal PCOS and diabetes.**

|                               | Maternal PCOS |             |            |            | No maternal PCOS |                |             |             |
|-------------------------------|---------------|-------------|------------|------------|------------------|----------------|-------------|-------------|
|                               | No DM         | GDM         | T2DM       | DM-IT      | No DM            | GDM            | T2DM        | DM-IT       |
| <b>Birth cohort 1996–2014</b> |               |             |            |            |                  |                |             |             |
| Spontaneous vaginal delivery  | 12 892 (69.3) | 3480 (66.7) | 306 (57.0) | 80 (25.7)  | 702 313 (76.9)   | 106 538 (73.0) | 5445 (66.5) | 1724 (30.7) |
| Induced vaginal delivery      | 1697 (9.1)    | 449 (8.6)   | 45 (8.4)   | 18 (5.8)   | 66 822 (7.3)     | 10 395 (7.1)   | 463 (5.7)   | 345 (6.1)   |
| Planned cesarean section      | 1607 (8.6)    | 478 (9.2)   | 86 (16.0)  | 108 (34.7) | 61 734 (6.8)     | 12 187 (8.4)   | 1036 (12.7) | 1971 (35.1) |
| Urgent cesarean section       | 2406 (12.9)   | 808 (15.5)  | 100 (18.6) | 105 (33.8) | 81 214 (8.9)     | 16 694 (11.4)  | 1222 (14.9) | 1571 (28.0) |
| Missing                       | 14 (0.1)      | 3 (0.1)     | 0 (0.0)    | 0 (0.0)    | 1265 (0.1)       | 1089 (0.1)     | 19 (0.2)    | 5 (0.1)     |
| <b>Birth cohort 2004–2014</b> |               |             |            |            |                  |                |             |             |
| Spontaneous vaginal delivery  | 8825 (69.0)   | 2578 (66.0) | 167 (55.3) | 65 (28.1)  | 399 408 (75.9)   | 67 688 (72.2)  | 2208 (66.1) | 1141 (31.1) |
| Induced vaginal delivery      | 1268 (9.9)    | 339 (8.7)   | 26 (8.6)   | 15 (6.5)   | 44 477 (8.4)     | 7222 (7.7)     | 225 (6.7)   | 245 (6.7)   |
| Planned cesarean section      | 1021 (8.0)    | 372 (9.5)   | 52 (17.2)  | 72 (31.2)  | 32 965 (6.3)     | 7576 (8.1)     | 400 (12.0)  | 1135 (30.9) |
| Urgent cesarean section       | 1673 (13.1)   | 618 (15.8)  | 57 (18.9)  | 79 (34.2)  | 49 268 (9.4)     | 11 233 (12.0)  | 508 (15.2)  | 1150 (31.3) |
| Missing                       | 1 (0.0)       | 2 (0.1)     | 0 (0.0)    | 0 (0.0)    | 381 (0.1)        | 31 (0.0)       | 1 (0.0)     | 3 (0.1)     |

Data are n (%). DM-IT, prepregnancy insulin-treated diabetes mellitus; T2DM, non-insulin-treated type 2 diabetes mellitus; GDM, gestational diabetes mellitus; PCOS, polycystic ovary syndrome. Mothers with DM-IT were excluded from the groups of T2DM and GDM, and likewise, mothers with T2DM were excluded from the GDM group. Mothers without DM-IT, T2DM or GDM were grouped as having no DM (diabetes mellitus).
