# Supplementary material for: Association of maternal polycystic ovary syndrome and diabetes with preterm birth and offspring birth size: a population-based cohort study
Source: PubMed Central journal article supplement — Hum Reprod. 2022 Mar 26;37(6):1311–23. doi: 10.1093/humrep/deac050 (PMC9156851; doi:10.1093/humrep/deac050), 2022-03-26
Supplement: deac050_supplementary_table_siii.pdf [file deac050_supplementary_table_siii.pdf]

**Supplementary Table SIII Adjusted odds ratio for total preterm birth according to maternal PCOS (PCOS diagnosis only, excluding anovulatory infertility) and diabetes in birth cohort 1996–2014.**

|                                                     | <37 weeks<br>(n = 59 110) | 32–36 weeks<br>(n = 51 550) | 28–31 weeks<br>(n = 5511) | <28 weeks<br>(n = 2049) |
|-----------------------------------------------------|---------------------------|-----------------------------|---------------------------|-------------------------|
| <b>No maternal PCOS, no anovulatory infertility</b> |                           |                             |                           |                         |
| No DM                                               | 1.00                      | 1.00                        | 1.00                      | 1.00                    |
| GDM                                                 | 0.89 (0.86 – 0.91)        | 0.93 (0.90 – 0.96)          | 0.68 (0.62 – 0.75)        | 0.58 (0.50 – 0.68)      |
| T2DM                                                | 1.91 (1.76 – 2.06)        | 1.94 (1.78 – 2.11)          | 1.49 (1.16 – 1.91)        | 1.60 (1.09 – 2.36)      |
| DM-IT                                               | 10.21 (9.58 – 10.87)      | 10.51 (9.86 – 11.20)        | 4.54 (3.72 – 5.55)        | 2.44 (1.60 – 3.73)      |
| <b>Maternal PCOS, no anovulatory infertility</b>    |                           |                             |                           |                         |
| No DM                                               | 1.44 (1.30 – 1.59)        | 1.37 (1.22 – 1.53)          | 1.52 (1.14 – 2.02)        | 2.62 (1.78 – 3.86)      |
| GDM                                                 | 1.18 (0.97 – 1.45)        | 1.20 (0.97 – 1.48)          | 0.82 (0.40 – 1.66)        | 2.03 (1.02 – 4.03)      |
| T2DM                                                | 2.51 (1.67 – 3.76)        | 1.93 (1.20 – 3.12)          | 5.42 (2.48 – 11.84)       | 4.55 (1.15 – 17.97)     |
| DM-IT                                               | 10.62 (7.09 – 15.91)      | 9.14 (6.00 – 13.93)         | 8.13 (3.18 – 20.77)       | 12.15 (3.83 – 38.54)    |

Preterm birth is defined as birth before 37 gestational weeks. GDM, gestational diabetes mellitus; T2DM, non-insulin-treated type 2 diabetes mellitus; DM-IT, prepregnancy insulin-treated diabetes mellitus; PCOS, polycystic ovary syndrome. Mothers without DM-IT, T2DM or GDM were grouped as having no DM. Mothers with DM-IT were excluded from the groups of T2DM and GDM, and likewise, mothers with T2DM were excluded from the GDM group. Births to non-PCOS mothers with no diabetes were used as the reference. The analysis was adjusted for offspring birth year, parity (0 or ≥1), maternal age at delivery, country of birth (Finland or not), smoking during pregnancy (yes/no) and mother married at delivery (yes/no). Values are odds ratio (95% CI).
