# Supplementary material for: Association of maternal polycystic ovary syndrome and diabetes with preterm birth and offspring birth size: a population-based cohort study
Source: PubMed Central journal article supplement — Hum Reprod. 2022 Mar 26;37(6):1311–23. doi: 10.1093/humrep/deac050 (PMC9156851; doi:10.1093/humrep/deac050), 2022-03-26
Supplement: deac050_supplementary_table_siv.pdf [file deac050_supplementary_table_siv.pdf]

**Supplementary Table SIV Adjusted odds ratio for spontaneous preterm birth according to maternal PCOS (PCOS diagnosis only, excluding anovulatory infertility) and diabetes in birth cohort 1996–2014.**

|                                                     | <37 weeks<br>(n = 43 658) | 32–36 weeks<br>(n = 37 268) | 28–31 weeks<br>(n = 4589) | <28 weeks<br>(n = 1801) |
|-----------------------------------------------------|---------------------------|-----------------------------|---------------------------|-------------------------|
| <b>No maternal PCOS, no anovulatory infertility</b> |                           |                             |                           |                         |
| No DM                                               | 1.00                      | 1.00                        | 1.00                      | 1.00                    |
| GDM                                                 | 1.02 (0.99 – 1.05)        | 1.08 (1.04 – 1.12)          | 0.77 (0.70 – 0.86)        | 0.65 (0.55 – 0.77)      |
| T2DM                                                | 2.39 (2.17 – 2.63)        | 2.40 (2.17 – 2.66)          | 1.94 (1.47 – 2.54)        | 2.15 (1.42 – 3.26)      |
| DM-IT                                               | 17.73 (16.11 – 19.52)     | 16.75 (15.22 – 18.45)       | 8.31 (6.58 – 10.50)       | 4.99 (3.16 – 7.87)      |
| <b>Maternal PCOS, no anovulatory infertility</b>    |                           |                             |                           |                         |
| No DM                                               | 1.56 (1.41 – 1.72)        | 1.48 (1.33 – 1.65)          | 1.59 (1.21 – 2.08)        | 2.73 (1.93 – 3.88)      |
| GDM                                                 | 1.80 (1.51 – 2.14)        | 1.85 (1.54 – 2.23)          | 1.10 (0.60 – 2.03)        | 2.50 (1.35 – 4.62)      |
| T2DM                                                | 3.63 (2.43 – 5.41)        | 2.59 (1.60 – 4.20)          | 8.20 (4.06 – 16.56)       | 5.38 (1.34 – 21.63)     |
| DM-IT                                               | 19.57 (11.51 – 33.27)     | 15.17 (8.79 – 26.17)        | 15.80 (6.33 – 39.44)      | 11.08 (2.66 – 46.23)    |

Spontaneous preterm births were all preterm births after excluding planned cesarean sections and induced vaginal labor. GDM, gestational diabetes mellitus; T2DM, non-insulin-treated type 2 diabetes mellitus; DM-IT, prepregnancy insulin-treated diabetes mellitus; PCOS, polycystic ovary syndrome. Mothers without DM-IT, T2DM or GDM were grouped as having no DM. Mothers with DM-IT were excluded from the groups of T2DM and GDM, and likewise, mothers with T2DM were excluded from the GDM group. Births to non-PCOS mothers with no diabetes were used as the reference. The analysis was adjusted for offspring birth year, parity (0 or  $\geq 1$ ), maternal age at delivery, country of birth (Finland or not), smoking during pregnancy (yes/no) and mother married at delivery (yes/no). Values are odds ratio (95% CI).
