# Supplementary material for: Association of maternal polycystic ovary syndrome and diabetes with preterm birth and offspring birth size: a population-based cohort study
Source: PubMed Central journal article supplement — Hum Reprod. 2022 Mar 26;37(6):1311–23. doi: 10.1093/humrep/deac050 (PMC9156851; doi:10.1093/humrep/deac050), 2022-03-26
Supplement: deac050_supplementary_table_sv.pdf [file deac050_supplementary_table_sv.pdf]

**Supplementary Table SV** Adjusted odds ratio for offspring being LGA and SGA in relation to maternal PCOS (PCOS diagnosis only, excluding anovulatory infertility) and diabetes in Finnish birth cohort 2004–2014.

|                                                     | LGA (n = 17 002) |                     | SGA (n = 20 428) |                  |
|-----------------------------------------------------|------------------|---------------------|------------------|------------------|
|                                                     | N (%)            | OR (95% CI)         | N (%)            | OR (95% CI)      |
| <b>No maternal PCOS, no anovulatory infertility</b> |                  |                     |                  |                  |
| No DM                                               | 9881 (1.9)       | 1.00                | 17 861 (3.4)     | 1.00             |
| GDM                                                 | 5028 (5.4)       | 2.10 (2.02–2.19)    | 2230 (2.4)       | 0.79 (0.75–0.83) |
| T2DM                                                | 429 (12.8)       | 4.37 (3.91–4.89)    | 97 (2.9)         | 1.07 (0.87–1.32) |
| DM-IT                                               | 1474 (40.1)      | 32.07 (29.82–34.49) | 54 (1.5)         | 0.45 (0.34–0.59) |
| <b>Maternal PCOS, no anovulatory infertility</b>    |                  |                     |                  |                  |
| No DM                                               | 80 (2.0)         | 0.99 (0.79–1.25)    | 153 (3.9)        | 1.07 (0.90–1.27) |
| GDM                                                 | 73 (6.0)         | 2.27 (1.78–2.89)    | 29 (2.4)         | 0.81 (0.56–1.19) |
| T2DM                                                | 9 (8.8)          | 2.28 (1.09–4.78)    | 2 (2.0)          | 0.75 (0.18–3.07) |
| DM-IT                                               | 28 (35.4)        | 21.69 (13.37–35.20) | 2 (2.5)          | 0.83 (0.20–3.39) |

LGA, large for gestational age; SGA, small for gestational age; OR, odds ratio; GDM, gestational diabetes mellitus; T2DM, non-insulin-treated type 2 diabetes mellitus; DM-IT, pre-pregnancy insulin-treated diabetes mellitus; PCOS, polycystic ovary syndrome. Mothers without DM-IT, T2DM or GDM were grouped as having no DM. Mothers with DM-IT were excluded from the groups of T2DM and GDM, and likewise, mothers with T2DM were excluded from the GDM group. Non-PCOS mothers with no diabetes were used as reference. Offspring birth year, parity (0 or  $\geq 1$ ), maternal age at delivery, maternal country of birth (Finland or not), smoking during pregnancy (yes/no), mother married at delivery (yes/no) and prepregnancy BMI were adjusted for.
